# Supplementary material
Source: PubMed Central journal article supplement (PMC10788376)
Supplement: NIHMS1917121-supplement-1.pdf [file NIHMS1917121-supplement-1.pdf]

**Supplementary table S1.** Anthropometric characteristics and sleep parameters in the polysomnographic study among patients who received CPAP titration study and those who did not (N = 519).

|                                       | CPAP titration study<br>(N = 225) |               | No CPAP titration study<br>(N = 294) |               | p     |
|---------------------------------------|-----------------------------------|---------------|--------------------------------------|---------------|-------|
|                                       | Median                            | (IQR)         | Median                               | (IQR)         |       |
| <b>Anthropometric characteristics</b> |                                   |               |                                      |               |       |
| Age (years)                           | 43.0                              | (35.0–52.0)   | 40.0                                 | (34.0–52.0)   | 0.13  |
| Neck circumference (cm)               | 39.8                              | (37.5–41.8)   | 39.5                                 | (37.4–41.5)   | 0.39  |
| BMI (kg/m <sup>2</sup> )              | 30.3                              | (27.6–33.2)   | 28.8                                 | (26.1–33.0)   | 0.03  |
| <b>OSA severity and endotypes</b>     |                                   |               |                                      |               |       |
| AHI (events/hour)                     | 43.9                              | (27.4–65.7)   | 33.3                                 | (21.2–59.6)   | 0.002 |
| Arousal threshold (% eupnea)          | 143.6                             | (126.7–185.1) | 134.5                                | (118.7–165.5) | 0.003 |
| Loop gain                             | 0.59                              | (0.47–0.71)   | 0.54                                 | (0.44–0.68)   | 0.01  |
| Collapsibility (% eupnea)             | 16.6                              | (7.0–46.7)    | 13.8                                 | (6.5–31.9)    | 0.06  |
| Upper airway gain                     | -0.09                             | (-0.44-0.20)  | -0.04                                | (-0.43–0.34)  | 0.54  |

AHI = apnea–hypopnea index; OSA = obstructive sleep apnea; IQR = interquartile range.

**Supplementary table S2.** Respiratory index in PSG study and CPAP titration studies, and mean CPAP optimal pressure during titration studies (N = 225).

|                                            |      | Arousal threshold |                   | Collapsibility    |                   | Loop gain         |                   | Upper airway gain |      |
|--------------------------------------------|------|-------------------|-------------------|-------------------|-------------------|-------------------|-------------------|-------------------|------|
|                                            |      | High              | Low               | High              | Low               | High              | Low               | High              | Low  |
| AHI (h <sup>-1</sup> )                     | PSG  | 60.7 <sup>†</sup> | 34.9 <sup>†</sup> | 61.8 <sup>†</sup> | 33.8 <sup>†</sup> | 57.0 <sup>†</sup> | 38.6 <sup>†</sup> | 50.2              | 45.5 |
|                                            | CPAP | 5.5               | 4.3               | 5.5               | 4.3               | 5.4               | 4.4               | 5.4               | 4.4  |
| Obstructive apnea index (h <sup>-1</sup> ) | PSG  | 44.2 <sup>†</sup> | 14.0 <sup>†</sup> | 42.7 <sup>†</sup> | 15.5 <sup>†</sup> | 37.3 <sup>†</sup> | 21.0 <sup>†</sup> | 31.7              | 19.5 |
|                                            | CPAP | 1.2               | 0.5               | 1.1               | 0.6               | 1.0               | 0.7               | 1.0               | 1.3  |
| Mixed apnea index (h <sup>-1</sup> )       | PSG  | 3.6 <sup>†</sup>  | 0.6 <sup>†</sup>  | 3.5 <sup>†</sup>  | 0.7 <sup>†</sup>  | 3.4 <sup>†</sup>  | 0.8 <sup>†</sup>  | 2.9               | 2.9  |
|                                            | CPAP | 0.2               | 0.03              | 0.2               | 0.04              | 0.1               | 0.1               | 0.1               | 0.2  |
| Central apnea index (h <sup>-1</sup> )     | PSG  | 0.2               | 0.5               | 0.3               | 0.3               | 0.3               | 0.3               | 0.4               | 0.2  |
|                                            | CPAP | 0.9               | 0.4               | 1.0               | 0.3               | 0.7               | 0.7               | 0.9               | 0.5  |
| Hypopnea index (h <sup>-1</sup> )          | PSG  | 12.7              | 19.8              | 3.3               | 17.3              | 16.1              | 16.5              | 15.2              | 17.3 |
|                                            | CPAP | 4.0               | 3.4               | 4.1               | 3.3               | 3.6               | 3.8               | 4.1               | 3.2  |
| Optimal pressure (cmH <sub>2</sub> O)      | CPAP | 9.5               | 8.7               | 9.3*              | 8.9*              | 9.7               | 8.6               | 9.5               | 8.7  |

AHI = apnea-hypopnea index; PSG = polysomnography; CPAP = continuous positive airway pressure.

<sup>†</sup>P < 0.05 of endotype effect in linear mixed regression analysis, and time effect was significant for all respiratory indices.

\*p < 0.05 in linear regression analysis, adjustment for age, sex, body-mass index, neck circumference, AHI, and all other endotypic groups.

**Supplementary table S3.** Anthropometric characteristics and sleep parameter in polysomnographic study among patients who used CPAP and those did not (N = 225).

|                                       | CPAP treatment<br>(N = 85) |               | Other treatment<br>(N = 140) |               | p    |
|---------------------------------------|----------------------------|---------------|------------------------------|---------------|------|
|                                       | Median                     | (IQR)         | Median                       | (IQR)         |      |
| <b>Anthropometric characteristics</b> |                            |               |                              |               |      |
| Age (years)                           | 44.0                       | (37.0–53.0)   | 42.0                         | (34.0–51.0)   | 0.08 |
| Waist circumference (cm)              | 99.5                       | (93.0–107.0)  | 99.0                         | (93.0–105.0)  | 0.66 |
| Neck circumference (cm)               | 39.5                       | (37.0–41.3)   | 39.5                         | (38.0–42.2)   | 0.41 |
| BMI (kg/m <sup>2</sup> )              | 30.3                       | (27.8–33.5)   | 30.2                         | (26.9–33.1)   | 0.79 |
| <b>OSA severity and endotypes</b>     |                            |               |                              |               |      |
| AHI (events/hour)                     | 48.4                       | (27.3–67.0)   | 38.5                         | (25.8–62.4)   | 0.23 |
| Arousal threshold (% eupnea)          | 148.6                      | (127.9–200.6) | 142.4                        | (125.8–183.0) | 0.57 |
| Loop gain                             | 0.59                       | (0.51–0.75)   | 0.58                         | (0.47–0.67)   | 0.08 |
| Collapsibility (% eupnea)             | 19.2                       | (9.8–48.0)    | 13.5                         | (6.0–45.1)    | 0.09 |
| Upper airway gain                     | -0.04                      | (-0.34–0.20)  | -0.12                        | (-0.46–0.22)  | 0.53 |
| <b>Sleep architecture (%)</b>         |                            |               |                              |               |      |
| Stage 1 sleep                         | 39.8                       | (28.3–60.4)   | 38.0                         | (22.5–54.9)   | 0.16 |
| Stage 2 sleep                         | 37.6                       | (20.6–50.6)   | 42.9                         | (28.0–53.2)   | 0.14 |
| Slow-wave sleep                       | 0                          | (0–0.3)       | 0                            | (0–0.7)       | 0.22 |
| REM sleep                             | 18.4                       | (12.7–22.7)   | 18.2                         | (14.0–22.6)   | 0.78 |
| Sleep efficiency                      | 85.0                       | (77.0–92.3)   | 85.3                         | (78.2–90.8)   | 0.71 |

AHI = apnea–hypopnea index; OSA = obstructive sleep apnea; REM = rapid eye movement; IQR = interquartile range.
